# Supplementary figures and images for: The Destructive Static Tree-Pulling Test Provides Reliable Estimates of the Soil–Root Plate of Eastern Baltic Silver Birch (Betula pendula Roth.)
Source: MDPI journal article supplement (doi:10.3390/plants11111509), 2022-06-04

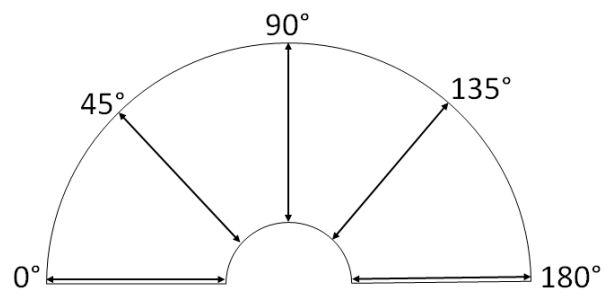

**Figure S1.** Five radii on the surface of soil-root plate (0°, 45°, 90°, 135°, and 180°).

Supplement: s1 [file s1]
